# Supplementary material for: A Keggin-type polyoxometalate-based metal–organic complex as a highly efficient heterogeneous catalyst for the selective oxidation of alkylbenzenes
Source: Royal Society of Chemistry journal article supplement (doi:10.1039/d1dt03823k), 2022-01-01
Supplement: d1dt03823k1.pdf [file d1dt03823k1.pdf]

# A Keggin-type Polyoxometalate-Based Metal–Organic Complex as Highly Efficient Heterogeneous Catalyst for Selective Oxidation of Alkylbenzenes

Yue Wang, Na Xu, Yue Zhang, Tong Zhang, Zhong Zhang, Xiao-Hui Li, and Xiu-Li Wang\*

†College of Chemistry and Materials Engineering, Bohai University, Professional Technology Innovation Center of Liaoning Province for Conversion Materials of Solar Cell, Jinzhou 121013, P. R. China.

Table S1. Bond lengths [Å] and angles [°] for complex 1

|                     |           |                      |           |
|---------------------|-----------|----------------------|-----------|
| Cu(1)-O(3)          | 2.675(11) | Cu(1)-O(3)#3         | 2.675(11) |
| Cu(1)-N(3)#4        | 1.975(11) | Cu(2)-N(2)#6         | 1.949(12) |
| Cu(1)-N(3)          | 1.975(11) | Cu(3)-N(1)           | 1.970(11) |
| Cu(1)-N(3)#1        | 1.975(11) | Cu(3)-N(1)#1         | 1.970(11) |
| Cu(1)-N(3)#5        | 1.975(11) | Cu(3)-O(3)           | 2.425(13) |
| Cu(2)-O(1W)#6       | 2.001(11) | Cu(3)-O(5)           | 1.976(10) |
| Cu(2)-O(1W)         | 2.001(11) | Cu(3)-O(5)#1         | 1.976(10) |
| Cu(2)-N(2)          | 1.949(12) | N(3)#5-Cu(1)-N(3)    | 89.3(6)   |
| N(2)-Cu(2)-N(2)#6   | 180.0(7)  | O(1W)-Cu(2)-O(1W)#6  | 180       |
| N(1)-Cu(3)-N(1)#1   | 94.6(6)   | N(2)-Cu(2)-O(1W)     | 88.2(5)   |
| N(1)#1-Cu(3)-O(3)   | 87.9(4)   | N(2)#6-Cu(2)-O(1W)#6 | 88.2(5)   |
| N(1)-Cu(3)-O(3)     | 87.9(4)   | N(2)#6-Cu(2)-O(1W)   | 91.8(5)   |
| N(1)-Cu(3)-O(5)#1   | 90.6(4)   | N(2)-Cu(2)-O(1W)#6   | 91.8(5)   |
| N(1)#1-Cu(3)-O(5)   | 90.6(4)   | N(1)#1-Cu(3)-O(5)#1  | 174.5(4)  |
| N(3)#4-Cu(1)-N(3)#1 | 89.3(6)   | N(1)-Cu(3)-O(5)      | 174.5(4)  |
| N(3)#1-Cu(1)-N(3)   | 90.7(6)   | O(5)-Cu(3)-O(3)      | 94.0(4)   |
| N(3)#4-Cu(1)-N(3)   | 180       | O(5)#1-Cu(3)-O(3)    | 94.0(4)   |
| N(3)#4-Cu(1)-N(3)#5 | 90.7(6)   | O(5)-Cu(3)-O(5)#1    | 84.1(6)   |
| N(3)#1-Cu(1)-N(3)#5 | 180.0(6)  |                      |           |

Symmetry code: #1 x,-y+1,z; #3 -x+2,y,-z+2; #4 -x+1,-y+1,-z+1;#5 -x+1,y,-z+1; #6 -x+1/2,-y+1/2,-z+1.

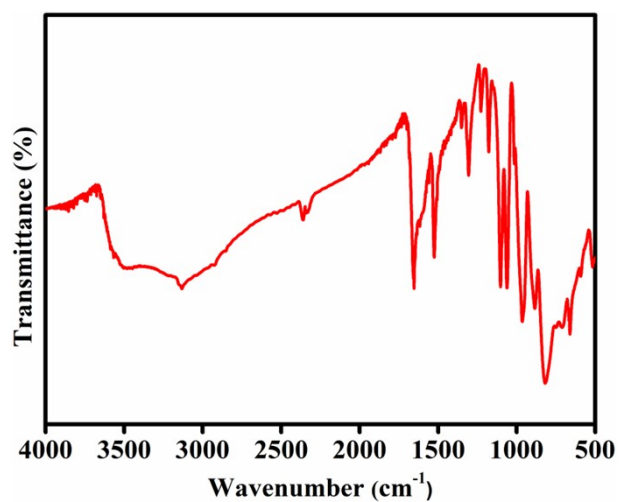

**Figure S1.** The IR spectrum of complex1.

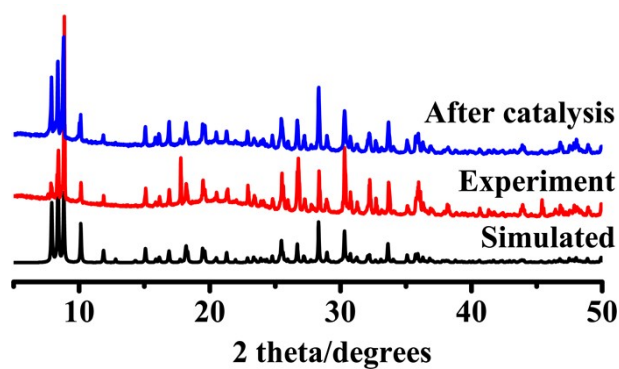

**Figure S2.** Experiment and simulated X-ray powder diffraction patterns for complex 1.

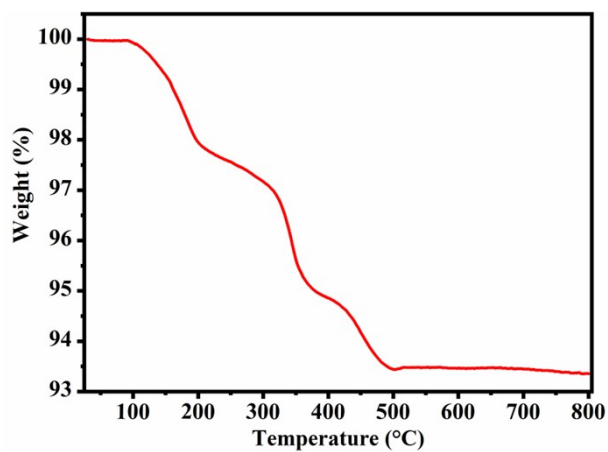

**Figure S3.** TG curve of complex 1.

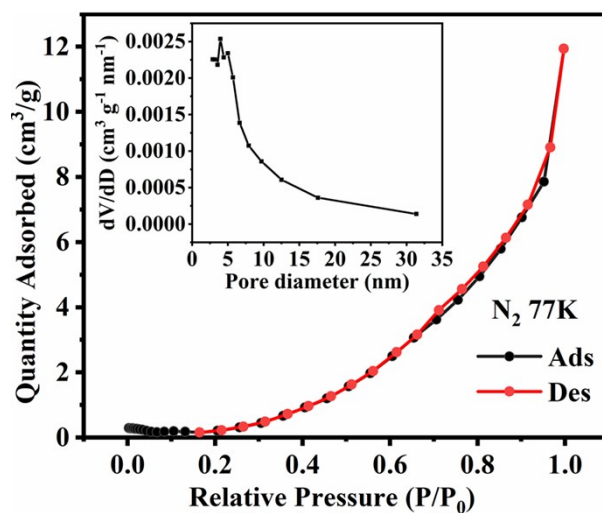

**Figure S4.** N<sub>2</sub> sorption isotherms of complex **1** at 77 K; P<sub>0</sub> represents 1 atm (inset: the pore size of complex **1**).

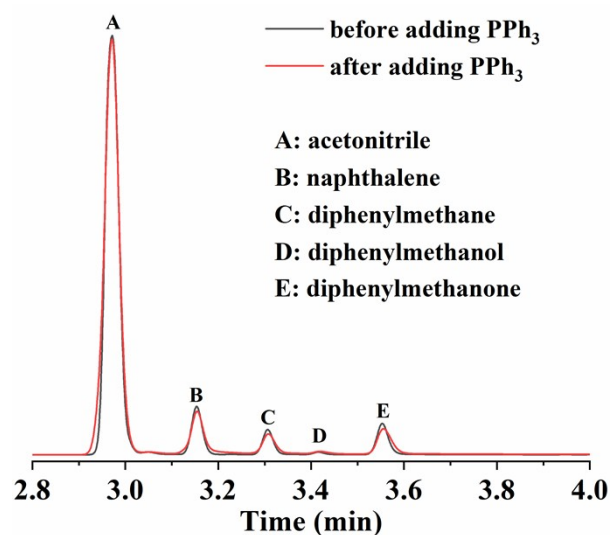

**Figure S5.** The chromatograms recorded before and after the addition of PPh<sub>3</sub>.

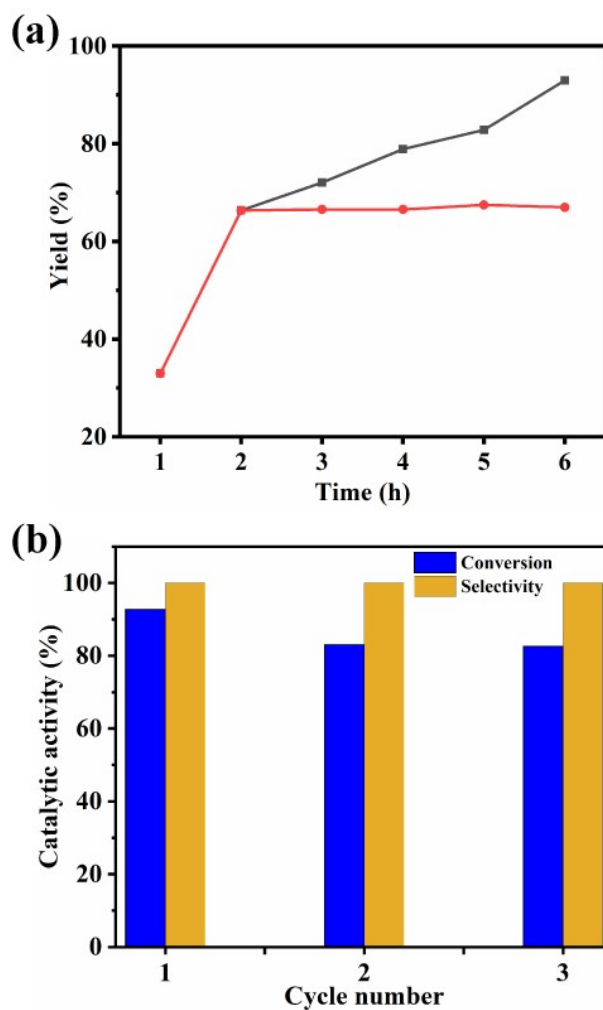

**Figure S6.** (a) Substrate conversion plotted in the reaction of diphenylmethane with complex **1** (gray) and the leaching test utilizing the hot filtration method (red). (b) Recyclability of complex **1** as a catalyst.

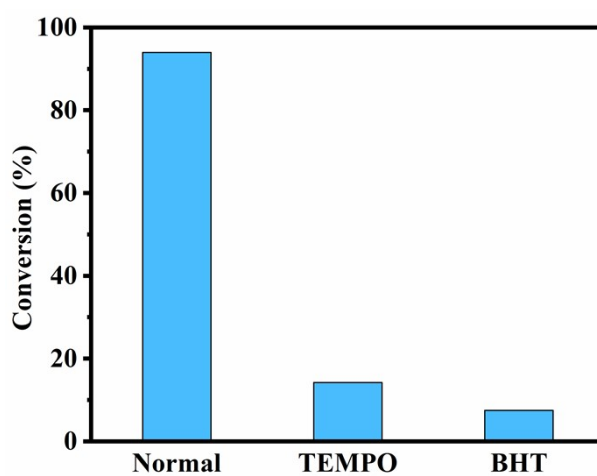

**Figure S7.** Conversions of diphenylmethane over complex **1** in the presence of different radical scavengers. Reaction conditions: diphenylmethane (0.1 mmol),

TBHP (0.4 mmol), catalyst (1 mol%), CH<sub>3</sub>CN (1 mL), TEMPO (0.2 mmol), BHT (0.2 mmol), T = 75 °C, and t = 6 h.
